# Supplementary material
Source: PubMed Central journal article supplement (PMC5313335)
Supplement: NIHMS827631-supplement-supplement_1.pdf [file NIHMS827631-supplement-supplement_1.pdf]

Supplemental Table. The number of post-donation ESRD events by donation year.

| Year of donation | Number of ESRD events | Year of donation | Number of ESRD events |
|------------------|-----------------------|------------------|-----------------------|
| 1987             | 4                     | 2001             | 17                    |
| 1988             | 12                    | 2002             | 9                     |
| 1989             | 17                    | 2003             | 4                     |
| 1990             | 19                    | 2004             | 3                     |
| 1991             | 15                    | 2005             | 4                     |
| 1992             | 20                    | 2006             | 3                     |
| 1993             | 8                     | 2007             | 3                     |
| 1994             | 19                    | 2008             | 1                     |
| 1995             | 21                    | 2009             | 0                     |
| 1996             | 17                    | 2010             | 1                     |
| 1997             | 13                    | 2011             | 0                     |
| 1998             | 15                    | 2012             | 1                     |
| 1999             | 11                    | 2013             | 0                     |
| 2000             | 14                    |                  |                       |
